# Supplementary material for: Antimicrobial resistance (AMR) and molecular characterization of Neisseria gonorrhoeae in Ghana, 2012-2015
Source: PubMed Central journal article supplement (PMC6786528; doi:10.1371/journal.pone.0223598), 2019-10-10
Supplement: pone.0223598.s001.pdf [file pone.0223598.s001.pdf]

| ID              | Site     | Species ID            | Pen          | IHZ_Pen  | MIC_Pen_Etest | Te           | IHZ_Te   | MIC_Te_Etest | AZ           | IHZ_AZ   | MIC_AZ_Etest | TXL          | IHZ_TXL  | MIC_TXL_Etest | IX          | IHZ_IX   | MIC_IX_Etest | CL           | IHZ_CL   | MIC_CL_Etest | SP          | IHZ_SP   | MIC_SP_Etest | Penicillinase by API-NH |          |          |
|-----------------|----------|-----------------------|--------------|----------|---------------|--------------|----------|--------------|--------------|----------|--------------|--------------|----------|---------------|-------------|----------|--------------|--------------|----------|--------------|-------------|----------|--------------|-------------------------|----------|----------|
| STI-ADB-055 (2) | ACCRA    | Neisseria gonorrhoeae | Intermediate | 46 [I]   | 0.94 [I]      | Resistant    | 22.3 [R] | 4 [R]        | Susceptible  | 39.9 [S] |              | Susceptible  | 56.9 [S] |               | Susceptible | 45.9 [S] |              | Resistant    | 13.3 [R] | 4 [R]        | Susceptible | 27.9 [S] |              |                         | negative |          |
| STI-ADB-088(4)  | ACCRA    | Neisseria gonorrhoeae | Resistant    | 6 [R]    | >32 [R]       | Resistant    | 6 [R]    | 128 [R]      | Susceptible  | 29 [R]   | 0.75 [S]     | Susceptible  | 39.3 [S] |               | Susceptible | 34.9 [S] |              | Resistant    | 6 [R]    | >32 [R]      | Susceptible | 24.4 [S] |              |                         | positive |          |
| STI-ADB-095(3)  | ACCRA    | Neisseria gonorrhoeae | Resistant    | 6 [R]    | >32 [R]       | Resistant    | 13.9 [R] | 32 [R]       | Susceptible  | 25 [R]   | 0.094 [S]    | Susceptible  | 25.7 [R] | ?             | Susceptible | 23.8 [R] | 0.094 [S]    | Susceptible  | 30.8 [I] | 0.006 [S]    | Susceptible | 16.8 [I] | 12 [S]       |                         | positive |          |
| STI-ADB-999(5)  | ACCRA    | Neisseria gonorrhoeae | Resistant    | 6 [R]    | >32 [R]       | Resistant    | 6 [R]    | 128 [R]      | Susceptible  | 29.7 [R] | ?            | Susceptible  | 42.7 [S] |               | Susceptible | 36.1 [S] |              | Resistant    | 8.9 [R]  | 12 [R]       | Susceptible | 23.9 [S] |              |                         | positive |          |
| STI-ADB-129(6)  | ACCRA    | Neisseria gonorrhoeae | Resistant    | 10.6 [R] | >32 [R]       | Resistant    | 8.6 [R]  | 16 [R]       | Susceptible  | 42.3 [S] |              | Susceptible  | 52.5 [S] |               | Susceptible | 49.7 [S] |              | Resistant    | 13.1 [R] | 4 [R]        | Susceptible | 26.1 [R] |              |                         | positive |          |
| STI-ADB-135(9)  | ACCRA    | Neisseria spp.        | Resistant    | 6 [R]    | >32 [R]       | Resistant    | 9.3 [R]  | 32 [R]       | Susceptible? | 27.3 [R] | ?            | Susceptible  | 38.3 [S] |               | Susceptible | 36.6 [S] |              | Intermediate | 11.1 [R] | 0.12 [I]     | Susceptible | 8 [S]    |              |                         | positive |          |
| STI-ADB-191(7)  | ACCRA    | Neisseria gonorrhoeae | Resistant    | 13 [R]   | >32 [R]       | Resistant    | 14 [R]   | 24 [R]       | Susceptible? | 34 [S]   |              | Susceptible? | 35 [R]   | ?             | Susceptible | 36.3 [S] |              | Resistant    | 17.9 [R] | 4 [R]        | Susceptible | 8 [S]    |              |                         | negative |          |
| STI-ADB-208(10) | ACCRA    | Neisseria gonorrhoeae | Resistant    | 6 [R]    | >32 [R]       | Resistant    | 6 [R]    | 128 [R]      | Susceptible  | 30.3 [S] |              | Susceptible  | 40 [S]   |               | Susceptible | 36.3 [S] |              | RESISTANT    | 6 [R]    | 32 [R]       | Susceptible | 12 [S]   |              |                         | positive |          |
| STI-ADB-216(11) | ACCRA    | Neisseria gonorrhoeae | Resistant    | 6 [R]    | >32 [R]       | Resistant    | 12.3 [R] | 32 [R]       | Susceptible  | 36 [S]   |              | Susceptible  | 43 [S]   |               | Susceptible | 34.4 [S] |              | Susceptible  | 40.9 [I] | 0.008 [S]    | Susceptible | 8 [S]    |              |                         | positive |          |
| STI-ADB-226(12) | ACCRA    | Neisseria gonorrhoeae | Resistant    | 12.3 [R] | 4 [R]         | Resistant    | 24 [R]   | 10.9 [R]     | Susceptible  | 20.8 [R] | 0.094 [S]    | Susceptible  | 39.3 [S] |               | Susceptible | 32.3 [S] |              | Resistant    | 8.2 [R]  | 12 [R]       | Susceptible | 8 [S]    |              |                         | positive |          |
| STI-ADB-230(13) | ACCRA    | Neisseria gonorrhoeae | Resistant    | 26.9 [I] | 4 [R]         | INTERMEDIATE | 25.6 [R] | 2 [R]        | SUSCEPTIBLE  | 29.4 [R] | 0.38 [S]     | Susceptible  | 35.2 [S] |               | Resistant   | 29.2 [R] | 0.75 [R]     | Resistant    | 6 [R]    | >32 [R]      | Susceptible | 16 [S]   |              |                         | negative |          |
| STI-ADB-242(14) | ACCRA    | Neisseria spp.        | Resistant    | 6 [R]    | >32 [R]       | Resistant    | 6 [R]    | 48 [R]       | Susceptible  | 31.8 [S] |              | Susceptible  | 38.7 [S] |               | Susceptible | 34.2 [S] |              | Resistant    | 6 [R]    | >32 [R]      | Susceptible | 8 [S]    |              |                         | positive |          |
| STI-ARM-015(37) | TAKORADI | Neisseria spp.        | Resistant    | 15.8 [R] | 8 [R]         | Resistant    | 11.2 [R] | 24 [R]       | Susceptible  | 32.5 [S] |              | Susceptible  | 45.8 [S] |               | Susceptible | 40.1 [S] |              | Resistant    | 14.4 [R] | 6 [R]        | Susceptible | 24.8 [S] |              |                         | positive |          |
| STI-ARM-046(15) | TAKORADI | Neisseria gonorrhoeae | Resistant    | 6 [R]    | >32 [R]       | Resistant    | 12 [R]   | 32 [R]       | Susceptible  | 32.3 [S] |              | Susceptible  | 40.3 [S] |               | Susceptible | 34.4 [S] |              | Resistant    | 13.6 [R] | 16 [R]       | Susceptible | 24.8 [S] |              |                         | negative |          |
| STI-ARM-069(16) | TAKORADI | Neisseria spp.        | Resistant    | 6 [R]    | >32 [R]       | Resistant    | 20 [R]   | 16 [R]       | Susceptible  | 34.5 [S] |              | Susceptible? | 33.6 [R] | ?             | Susceptible | 6 [R]    | 0.016 [S]    | Susceptible  | 22.7 [R] | 0.006 [S]    | Susceptible | 29.6 [S] |              |                         | positive |          |
| STI-ARM-073(17) | TAKORADI | Neisseria gonorrhoeae | Resistant    | 9.5 [R]  | >32 [R]       | Resistant    | 10.2 [R] | 32 [R]       | Susceptible  | 35.5 [S] |              | Susceptible  | 48.4 [S] |               | Susceptible | 42.8 [S] |              | Susceptible  | 48.4 [S] |              | Susceptible | 25.6 [S] |              |                         | positive |          |
| STI-ARM-103(18) | TAKORADI | Neisseria gonorrhoeae | Intermediate | 42.1 [I] | 0.19 [I]      | Resistant    | 11.8 [R] | 32 [R]       | Susceptible  | 36.5 [S] |              | Susceptible  | 49.3 [S] |               | Susceptible | 40.3 [S] |              | Resistant    | 17.4 [R] | 4 [R]        | Susceptible | 28.4 [S] |              |                         | negative |          |
| STI-ARM-106(19) | TAKORADI | Neisseria gonorrhoeae | Resistant    | 6 [R]    | >32 [R]       | Resistant    | 6 [R]    | 128 [R]      | Susceptible  | 33.2 [S] |              | Susceptible  | 46.8 [S] |               | Susceptible | 39.7 [S] |              | Resistant    | 6 [R]    | >32 [R]      | Susceptible | 26.2 [S] |              |                         | positive |          |
| STI-ARM-122(20) | TAKORADI | Neisseria spp.        | Resistant    | 6 [R]    | >32 [R]       | Resistant    | 14.1 [R] | 16 [R]       | Susceptible  | 31.7 [S] |              | Susceptible  | 48.3 [S] |               | Susceptible | 39.1 [S] |              | Resistant    | 15.2 [R] | 3 [R]        | Susceptible | 4 [S]    |              |                         | positive |          |
| STI-ARM-127(21) | TAKORADI | Neisseria spp.        | Resistant    | 9.1 [R]  | >32 [R]       | Resistant    | 9.4 [R]  | 48 [R]       | Susceptible  | 25.5 [R] | ?            | Susceptible  | 41.4 [S] |               | Susceptible | 37.1 [S] |              | Susceptible  | 36.7 [I] | 0.016 [I]    | Susceptible | 37.1 [S] | 12 [S]       |                         |          | positive |
| STI-ARM-162(22) | TAKORADI | Neisseria gonorrhoeae | Resistant    | 6 [R]    | >32 [R]       | Resistant    | 22.4 [R] | 3 [R]        | Susceptible  | 30.5 [S] |              | Susceptible  | 37.1 [S] |               | Susceptible | 36 [S]   |              | Resistant    | 6 [R]    | >32 [R]      | Susceptible | 6 [S]    |              |                         | positive |          |
| STI-ARM-163(23) | TAKORADI | Neisseria gonorrhoeae | Resistant    | 6 [R]    | >32 [R]       | Resistant    | 20.6 [R] | 3 [R]        | SUSCEPTIBLE  | 27.1 [R] | 0.38 [S]     | Susceptible  | 36.6 [S] |               | Susceptible | 29.9 [R] | ?            | Resistant    | 6 [R]    | 16 [R]       | Susceptible | 16 [S]   |              |                         | positive |          |
| STI-ARM-165(24) | TAKORADI | Neisseria gonorrhoeae | Resistant    | 6 [R]    | >32 [R]       | Resistant    | 22 [R]   | 3 [R]        | Susceptible  | 30.4 [S] |              | Susceptible  | 37.7 [S] |               | Susceptible | 33.8 [S] |              | Resistant    | 6 [R]    | 12 [R]       | Susceptible | 12 [S]   |              |                         | positive |          |
| STI-ARM-212(25) | TAKORADI | Neisseria gonorrhoeae | Intermediate | 25 [R]   | 0.75 [I]      | Resistant    | 16 [R]   | 16 [R]       | Susceptible  | 30 [R]   | ?            | Susceptible? | 32 [R]   | ?             | Susceptible | 34 [S]   |              | Resistant    | 15 [R]   | 6 [R]        | Susceptible | 27 [S]   | 4 [S]        |                         | negative |          |
| STI-NAV-020(26) | TAKORADI | Neisseria gonorrhoeae | Resistant    | 7 [R]    | 3 [R]         | Resistant    | 15.8 [R] | 12 [R]       | Susceptible  | 40.8 [S] |              | Susceptible  | 39 [S]   |               | Susceptible | 44.2 [S] |              | Resistant    | 15.4 [R] | >32 [R]      | Susceptible | 29 [S]   |              |                         | positive |          |
| STI-NAV-029(27) | TAKORADI | Neisseria gonorrhoeae | Resistant    | 6 [R]    | >32 [R]       | Resistant    | 6 [R]    | 128 [R]      | Susceptible  | 30.8 [S] | 0.5 [S]      | Susceptible  | 47.5 [S] |               | Susceptible | 43.6 [S] |              | Resistant    | 6 [R]    | >32 [R]      | Susceptible | 27.9 [S] |              |                         | positive |          |
| STI-NAV-031(28) | TAKORADI | Neisseria gonorrhoeae | Resistant    | 6 [R]    | >32 [R]       | Resistant    | 6 [R]    | 256 [R]      | Susceptible? | 27.8 [R] | ?            | Susceptible  | 46.9 [S] |               | Susceptible | 42 [S]   |              | Resistant    | 6 [R]    | >32 [R]      | Susceptible | 26.1 [S] |              |                         | positive |          |
| STI-NAV-040(29) | TAKORADI | Neisseria gonorrhoeae | Resistant    | 10.6 [R] | >32 [R]       | Resistant    | 10.6 [R] | 24 [R]       | Susceptible  | 39 [S]   |              | Susceptible  | 42 [S]   |               | Susceptible | 38.8 [S] |              | Resistant    | 15.3 [R] | 3 [R]        | Susceptible | 26.7 [S] |              |                         | positive |          |
| STI-TMH-040(30) | ACCRA    | Neisseria gonorrhoeae | Resistant    | 10.6 [R] | 24 [R]        | Resistant    | 10.3 [R] | 256 [R]      | Susceptible  | 39 [S]   |              | Susceptible  | 42 [S]   |               | Susceptible | 38.8 [S] |              | Susceptible  | 15.3 [R] | 0.004 [S]    | Susceptible | 26.7 [S] |              |                         | negative |          |
| STI-TMH-042(31) | ACCRA    | Neisseria gonorrhoeae | Resistant    | 6 [R]    | >32 [R]       | Resistant    | 14 [R]   | 24 [R]       | Susceptible  | 35.1 [S] | 0.094 [S]    | Susceptible  | 35 [R]   | ?             | Susceptible | 32 [S]   |              | Resistant    | 17 [R]   | 8 [R]        | Susceptible | 26 [S]   |              |                         | positive |          |
| STI-TMH-050(32) | ACCRA    | Neisseria gonorrhoeae | Resistant    | 6 [R]    | >32 [R]       | Resistant    | 15 [R]   | 24 [R]       | Susceptible  | 30.7 [S] | 0.125 [S]    | Susceptible  | 41 [S]   |               | Susceptible | 35 [S]   |              | Resistant    | 15 [R]   | 8 [R]        | Susceptible | 26 [S]   |              |                         | positive |          |
| STI-TMH-067(33) | ACCRA    | Neisseria gonorrhoeae | Resistant    | 6 [R]    | >32 [R]       | Resistant    | 13.7 [R] | 24 [R]       | Susceptible  | 35.4 [S] |              | Susceptible  | 43.2 [S] |               | Susceptible | 40.8 [S] |              | Resistant    | 16.1 [R] | 3 [R]        | Susceptible | 23.7 [S] |              |                         | positive |          |
| STI-TMH-068(34) | ACCRA    | Neisseria gonorrhoeae | Resistant    | 6 [R]    | >32 [R]       | Resistant    | 6 [R]    | 128 [R]      | Susceptible  | 27.8 [R] | 0.125 [S]    | Susceptible  | 33.3 [R] | 0.023 [S]     | Susceptible | 32.7 [S] |              | Resistant    | 6 [R]    | >32 [R]      | Susceptible | 21 [S]   |              |                         | positive |          |
| STI-TMH-074(35) | ACCRA    | Neisseria spp.        | Resistant    | 6.7 [R]  | >32 [R]       | Resistant    | 11.9 [R] | 32 [R]       | Susceptible  | 26.4 [R] | 0.125 [S]    | Susceptible  | 31.9 [R] | 0.004 [S]     | Susceptible | 32 [S]   |              | Resistant    | 11.4 [R] | 6 [R]        | Susceptible | 20.5 [S] |              |                         | positive |          |
| STI-TMH-289(36) | ACCRA    | Neisseria gonorrhoeae | Resistant    | 6 [R]    | >32 [R]       | Resistant    | 6 [R]    | 128 [R]      | Susceptible  | 28 [R]   | 0.19 [S]     | Susceptible  | 36.8 [S] |               | Susceptible | 34.4 [S] |              | Resistant    | 6 [R]    | 32 [R]       | Susceptible | 21 [S]   |              |                         | positive |          |
| STI-TMH-384(39) | ACCRA    | Neisseria gonorrhoeae | Intermediate | 34.6 [I] | 0.75 [I]      | Resistant    | 6 [R]    | 96 [R]       | Susceptible  | 34.6 [S] |              | Susceptible  | 49.8 [S] |               | Susceptible | 42.7 [S] |              | Resistant    | 6 [R]    | >32 [R]      | Susceptible | 12 [S]   |              |                         | negative |          |
| STI-TMH-453(40) | ACCRA    | Neisseria gonorrhoeae | Resistant    | 10.9 [R] | >32 [R]       | Resistant    | 11.7 [R] | 24 [R]       | Susceptible  | 33 [S]   |              | Susceptible  | 39.9 [S] |               | Susceptible | 37.7 [S] |              | Resistant    | 14.1 [R] | 4 [R]        | Susceptible | 6 [S]    |              |                         | positive |          |
| STI-TMH-455(41) | ACCRA    | Neisseria gonorrhoeae | Resistant    | 6 [R]    | >32 [R]       | Resistant    | 12.7 [R] | 12 [R]       | Susceptible  | 38.2 [S] |              | Susceptible  | 52.8 [S] |               | Susceptible | 41.1 [S] |              | Resistant    | 14.5 [R] | 4 [R]        | Susceptible | 3 [S]    |              |                         | positive |          |
| STI-TMH-458(42) | ACCRA    | Neisseria gonorrhoeae | Resistant    | 6 [R]    | >32 [R]       | Resistant    | 17.8 [R] | 16 [R]       | Susceptible  | 31.9 [S] |              | Susceptible  | 44.1 [S] |               | Susceptible | 37.9 [S] |              | Resistant    | 11.2 [R] | 16 [R]       | Susceptible | 24 [S]   |              |                         | positive |          |
| STI-TMH-462(43) | ACCRA    | Neisseria gonorrhoeae | Resistant    | 6 [R]    | >32 [R]       | Resistant    | 14.5 [R] | 24 [R]       | Susceptible  | 32.7 [S] |              | Susceptible  | 39.7 [S] |               | Susceptible | 38.2 [S] |              | Resistant    | 11.2 [R] | 16 [R]       | Susceptible | 24 [S]   |              |                         | positive |          |
| STI-TMH-465(44) | ACCRA    | Neisseria gonorrhoeae | Resistant    | 6 [R]    | >32 [R]       | Resistant    | 6 [R]    | 96 [R]       | Susceptible  | 33.2 [S] |              | Susceptible  | 42.2 [S] |               | Susceptible | 38.7 [S] |              | Susceptible  | 44.9 [S] | 0.016 [S]    | Susceptible | 12 [S]   |              |                         | positive |          |
| STI-TMH-484(45) | ACCRA    | Neisseria spp.        | Resistant    | 6 [R]    | >32 [R]       | Resistant    | 13.6 [R] | 16 [R]       | Susceptible  | 38.6 [S] |              | Susceptible  | 45.7 [S] |               | Susceptible | 44.4 [S] |              | Resistant    | 15.8 [R] | 6 [R]        | Susceptible | 8 [S]    |              |                         | positive |          |
| STI-TMH-524(46) | ACCRA    | Neisseria gonorrhoeae | Resistant    | 6 [R]    | >32 [R]       | Resistant    | 11.3 [R] | 32 [R]       | Susceptible  | 30.2 [S] | 0.094 [S]    | Susceptible  | 30.9 [R] | ?             | Susceptible | 23.5 [R] | 0.125 [S]    | Resistant    | 10.2 [R] | 8 [R]        | Susceptible | 16 [S]   |              |                         | positive |          |
| STI-TMH-537(47) | ACCRA    | Neisseria gonorrhoeae | Resistant    | 6 [R]    | >32 [R]       | Resistant    | 12.8 [R] | 24 [R]       | Susceptible  | 28.1 [R] | 0.19 [S]     | Susceptible  | 37.7 [S] |               | Susceptible | 37.7 [S] |              | Resistant    | 14.2 [R] | 3 [R]        | Susceptible | 22.1 [S] |              |                         | positive |          |
