# Supplementary material for: Antimicrobial resistance (AMR) and molecular characterization of Neisseria gonorrhoeae in Ghana, 2012-2015
Source: PubMed Central journal article supplement (PMC6786528; doi:10.1371/journal.pone.0223598), 2019-10-10
Supplement: pone.0223598.s002.pdf [file pone.0223598.s002.pdf]

| Molecular work performed on Neisseria gonorrhoeae isolates |               |                 |               |                         |                         |                       |               |                 |                 |                           |
|------------------------------------------------------------|---------------|-----------------|---------------|-------------------------|-------------------------|-----------------------|---------------|-----------------|-----------------|---------------------------|
| Test performed                                             |               |                 |               |                         |                         |                       |               |                 |                 |                           |
| Sequencing primers                                         |               | Primer pair 1   | Primer pair 2 | Primer pair 3a,3b,3c,3d | Primer pair 3a,3b,3c,3d | Por allele #          | TbpB allele # | Allelic profile |                 |                           |
| Serial number                                              | Sample number | Collection date | Por PCR 680bp | TbpB PCR 550bp          | PBP2 PenA1 PCR 1100bp   | PBP2 PenA2 PCR 1200bp |               |                 | (Sequence type) | beta lactamase reactivity |
| 2                                                          | ADB055        | 20-Jan-14       | 1             | 1                       | 0                       | 1                     | 1050          | 98              | 1737            | neg                       |
| 3                                                          | ADB095        | 14-Apr-14       | 1             | 1                       | 0                       | 1                     | 90            | 3608            | 16216           | pos                       |
| 4                                                          | ADB088        | 27-Mar-14       | 1             | 1                       | 0                       | 1                     | 9431          | 2609            | 16217           | pos                       |
| 5                                                          | ADB099        | 5-May-14        | 1             | 1                       | 0                       | 1                     | 315           | 996             | 8948            | pos                       |
| 6                                                          | ADB129        | 31-Jul-14       | 1             | 1                       | 0                       | 1                     | 315           | 1649            | 16218           | pos                       |
| 7                                                          | ADB191        | 21-Apr-15       | 1             | 1                       | 0                       | 1                     | 90            | 133             | 355             | neg                       |
| 9                                                          | ADB135        | 12-Aug-14       | 1             | 1                       | 0                       | 1                     | 596           | 2610            | 16219           | pos                       |
| 10                                                         | ADB208        | 13-May-15       | 1             | 1                       | 0                       | 1                     | 315           | 996             | 8948            | pos                       |
| 11                                                         | ADB216        | 10-Jun-15       | 1             | 1                       | 0                       | 1                     | 1923          | 29              | 3178            | pos                       |
| 12                                                         | ADB226        | 29-Jun-15       | 1             | 1                       | 0                       | 1                     | 64            | 1844            | 10251           | pos                       |
| 13                                                         | ADB230        | 12-Aug-15       | 1             | 1                       | 1                       | 1                     | 908           | 110             | 1407            | neg                       |
| 14                                                         | ADB242        | 14-Sep-15       | 1             | 1                       | 0                       | 1                     | 9432          | 58              | 16220           | pos                       |
| 15                                                         | ARM046        | 20-Feb-13       | 1             | 1                       | 0                       | 1                     | 9433          | 1134            | 16221           | neg                       |
| 16                                                         | ARM069        | 13-Aug-13       | 1             | 1                       | 0                       | 1                     | 9434          | 1649            | 16222           | pos                       |
| 17                                                         | ARM073        | 10-Sep-13       | 1             | 1                       | 0                       | 1                     | 9434          | 1649            | 16222           | pos                       |
| 18                                                         | ARM103        | 21-Feb-14       | 1             | 1                       | 0                       | 1                     | 5861          | 98              | 9919            | neg                       |
| 19                                                         | ARM106        |                 | 1             | 1                       | 0                       | 1                     | 315           | 996             | 8948            | pos                       |
| 20                                                         | ARM122        | 5-Jun-14        | 1             | 1                       | 0                       | 1                     | 1050          | 98              | 1737            | pos                       |
| 21                                                         | ARM127        | 26-Jun-14       | 1             | 1                       | 0                       | 1                     | 90            | 732             | 3370            | pos                       |
| 22                                                         | ARM162        | 26-Jun-15       | 1             | 1                       | 0                       | 1                     | 315           | 996             | 8948            | pos                       |
| 23                                                         | ARM163        | 23-Jun-15       | 1             | 1                       | 0                       | 1                     | 315           | 996             | 8948            | pos                       |
| 24                                                         | ARM165        | 3-Jul-15        | 1             | 1                       | 0                       | 1                     | 315           | 996             | 8948            | pos                       |
| 25                                                         | ARM212        | 1-Dec-15        | 1             | 1                       | 0                       | 1                     | 9435          | 58              | 16223           | neg                       |
| 26                                                         | NAV020        | 9-Aug-13        | 1             | 1                       | 0                       | 1                     | 9436          | 98              | 16224           | pos                       |
| 27                                                         | NAV029        | 25-Feb-14       | 1             | 1                       | 0                       | 1                     | 315           | 996             | 8948            | pos                       |
| 28                                                         | NAV031        | 26-Feb-14       | 1             | 1                       | 0                       | 1                     | 315           | 996             | 8948            | pos                       |
| 29                                                         | NAV040        | 26-Nov-13       | 1             | 1                       | 0                       | 1                     | 90            | 133             | 355             | pos                       |
| 30                                                         | TMH040        | 12-Sep-12       | 1             | 1                       | 0                       | 1                     | 4301          | 131             | 16225           | neg                       |
| 31                                                         | TMH042        | 13-Sep-12       | 1             | 1                       | 0                       | 1                     | 9437          | 98              | 16226           | pos                       |
| 32                                                         | TMH050        | 27-Sep-12       | 1             | 1                       | 0                       | 1                     | 596           | 98              | 16227           | pos                       |
| 33                                                         | TMH067        | 29-Oct-12       | 1             | 1                       | 0                       | 1                     | 9437          | 98              | 16226           | pos                       |
| 34                                                         | TMH068        | 6-Nov-12        | 1             | 1                       | 0                       | 1                     | 315           | 996             | 8948            | pos                       |
| 35                                                         | TMH074        | 9-Nov-12        | 1             | 1                       | 0                       | 1                     | 9438          | 98              | 16228           | pos                       |
| 36                                                         | TMH289        | 11-Feb-14       | 1             | 1                       | 0                       | 1                     | 315           | 2611            | 16229           | pos                       |
| 37                                                         | AIR015        |                 | 1             | 1                       | 0                       | 1                     | 90            | 732             | 3370            | pos                       |
| 39                                                         | TMH384        | 21-Aug-14       | 1             | 1                       | 0                       | 1                     | 1350          | 996             | 16230           | neg                       |
| 40                                                         | TMH453        | 26-Jun-15       | 1             | 1                       | 0                       | 1                     | 90            | 133             | 355             | pos                       |
| 41                                                         | TMH455        | 29-Jun-15       | 1             | 1                       | 0                       | 1                     | 832           | 2612            | 16231           | pos                       |
| 42                                                         | TMH458        | 3-Jul-15        | 1             | 1                       | 0                       | 1                     | 64            | 1844            | 10251           | pos                       |
| 43                                                         | TMH462        | 7-Jul-15        | 1             | 1                       | 0                       | 1                     | 64            | 1844            | 10251           | pos                       |
| 44                                                         | TMH465        | 16-Jul-15       | 1             | 1                       | 0                       | 1                     | 3611          | 119             | 9523            | pos                       |
| 45                                                         | TMH484        | 20-Jun-15       | 1             | 1                       | 1                       | 1                     | 1439          | 2613            | 16232           | pos                       |
| 46                                                         | TMH524        | 30-Oct-15       | 1             | 1                       | 0                       | 1                     | 1923          | 191             | 12791           | pos                       |
| 47                                                         | TMH537        | 1-Dec-15        | 1             | 1                       | 0                       | 1                     | 103           | 98              | 2025            | pos                       |
